# Supplementary material
Source: Royal Society of Chemistry journal article supplement (doi:10.1039/d6cp00545d)
Supplement: d6cp00545d1.pdf [file d6cp00545d1.pdf]

## Supplementary Material

### Device simulation of layer dependence on 10-nm-gate MoS<sub>2</sub> transistors

Hong Li<sup>1,\*</sup>, Tianshuo Duan<sup>1</sup>, Xiaotian Hu<sup>1</sup>, Lina Si<sup>1</sup>, Fengbin Liu<sup>1</sup>, and Jing Lu<sup>2, 3, 4\*</sup>

<sup>1</sup> College of Mechanical and Material Engineering, North China University of Technology,  
Beijing 100144, P. R. China

<sup>2</sup> State Key Laboratory of Mesoscopic Physics and Department of Physics, Peking University,  
Beijing 100871, P. R. China

<sup>3</sup> Collaborative Innovation Center of Quantum Matter, Beijing 100871, P. R. China

<sup>4</sup> Peking University Yangtze Delta Institute of Optoelectronics, Nantong 226000, P. R. China

\*Corresponding author: [jinglu@pku.edu.cn](mailto:jinglu@pku.edu.cn); [lihong@ncut.edu.cn](mailto:lihong@ncut.edu.cn)

**Table S1.** Device performances for  $n$ - and  $p$ -type 10-nm-gate MoS<sub>2</sub> MOSFETs with 1 to 3 layers under various doping concentrations at  $V_{dd} = 0.5$  V. The IRDS LP and HP targets for “5am eq” node (2023 version) are given for comparison. Here,  $N_{s/d}$ : source/drain doping concentration;  $I_{off}$ : off-state current;  $I_{on}$ : on-state current; SS: subthreshold swing;  $g_m$ : transconductance;  $C_g$ : intrinsic gate capacitance (excluding parasitic capacitances);  $\tau$ : delay time; and PDP: power dissipation.

| type               | layer | $N_{s/d}$<br>(cm <sup>-2</sup> ) | $I_{off}$<br>( $\mu$ A/ $\mu$ m) | $I_{on}$<br>( $\mu$ A/ $\mu$ m) | SS<br>(mV/dec) | $g_m$<br>(mS/ $\mu$ m) | $C_g$<br>(fF/ $\mu$ m) | $\tau$<br>(ps) | PDP<br>(fJ/ $\mu$ m) |
|--------------------|-------|----------------------------------|----------------------------------|---------------------------------|----------------|------------------------|------------------------|----------------|----------------------|
| $n$ -type          | ML    | $6 \times 10^{13}$               | $10^{-4}$                        | 170                             | 58             | 1.03                   | 0.26                   | 2.25           | 0.19                 |
|                    | ML    | $1 \times 10^{14}$               | $10^{-4}$                        | 312                             | 54             | 1.97                   | 0.24                   | 1.17           | 0.18                 |
|                    | BL    | $1 \times 10^{13}$               | $10^{-4}$                        | 398                             | 56             | 2.20                   | 0.21                   | 0.80           | 0.16                 |
|                    | BL    | $1 \times 10^{14}$               | $10^{-4}$                        | 261                             | 57             | 5.72                   | 0.29                   | 1.65           | 0.21                 |
| $p$ -type          | ML    | $1 \times 10^{13}$               | $10^{-4}$                        | 289                             | 52             | 1.40                   | 0.19                   | 0.99           | 0.14                 |
|                    | ML    | $6 \times 10^{13}$               | $10^{-4}$                        | 718                             | 46             | 6.83                   | 0.17                   | 0.37           | 0.13                 |
|                    | BL    | $6 \times 10^{13}$               | $10^{-4}$                        | 272                             | 64             | 7.45                   | 0.22                   | 1.20           | 0.16                 |
|                    | BL    | $1 \times 10^{14}$               | $10^{-4}$                        | 252                             | 66             | 8.26                   | 0.25                   | 1.46           | 0.18                 |
| IRDS LP (“5am eq”) |       |                                  | $10^{-4}$                        | 587                             | 65             | —                      | 0.37                   | 1.13           | 0.40                 |
| $n$ -type          | ML    | $1 \times 10^{13}$               | $10^{-2}$                        | 385                             | 55             | 1.98                   | 0.28                   | 1.09           | 0.21                 |
|                    | ML    | $6 \times 10^{13}$               | $10^{-2}$                        | 305                             | 58             | 1.03                   | 0.79                   | 3.91           | 0.60                 |
|                    | BL    | $1 \times 10^{13}$               | $10^{-2}$                        | 458                             | 56             | 2.20                   | 0.22                   | 0.72           | 0.16                 |
|                    | BL    | $1 \times 10^{14}$               | $10^{-2}$                        | 1176                            | 57             | 5.72                   | 0.34                   | 0.44           | 0.26                 |
|                    | TL    | $1 \times 10^{13}$               | $10^{-2}$                        | 462                             | 68             | 2.16                   | 0.25                   | 0.82           | 0.19                 |
|                    | TL    | $1 \times 10^{14}$               | $10^{-2}$                        | 749                             | 71             | 6.43                   | 0.36                   | 0.72           | 0.27                 |
| $p$ -type          | ML    | $1 \times 10^{13}$               | $10^{-2}$                        | 289                             | 52             | 1.40                   | 0.15                   | 0.75           | 0.11                 |
|                    | ML    | $1 \times 10^{14}$               | $10^{-2}$                        | 1309                            | 46             | 8.20                   | 0.26                   | 0.30           | 0.20                 |
|                    | BL    | $1 \times 10^{13}$               | $10^{-2}$                        | 503                             | 63             | 2.50                   | 0.16                   | 0.48           | 0.12                 |
|                    | BL    | $1 \times 10^{14}$               | $10^{-2}$                        | 1257                            | 66             | 8.26                   | 0.29                   | 0.35           | 0.22                 |
|                    | TL    | $1 \times 10^{13}$               | $10^{-2}$                        | 589                             | 72             | 2.97                   | 0.18                   | 0.46           | 0.14                 |
|                    | TL    | $1 \times 10^{14}$               | $10^{-2}$                        | 738                             | 76             | 6.75                   | 0.32                   | 0.65           | 0.24                 |
| IRDS HP (“5am eq”) |       |                                  | $10^{-2}$                        | 790                             | 70             | —                      | 0.37                   | 0.84           | 0.40                 |

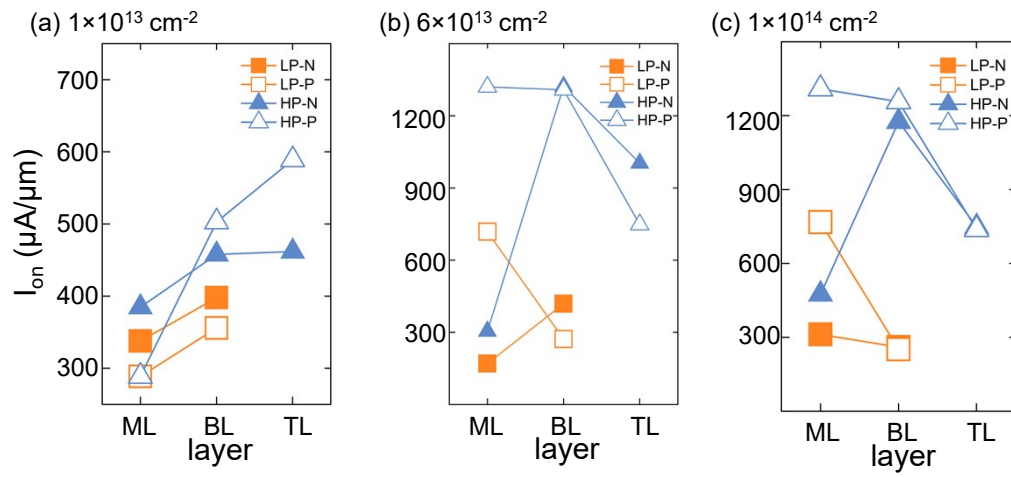

**Figure S1.** Layer-dependent  $I_{on}$  of the  $n$ - and  $p$ -type 10-nm-gate  $MoS_2$  MOSFETs under doping concentrations of (a)  $1 \times 10^{13}$ , (b)  $6 \times 10^{13}$ , and (c)  $1 \times 10^{14} \text{ cm}^{-2}$  for LP and HP applications.
